# Supplementary material for: Comparison of metastatic castration-resistant prostate cancer in bone with other sites: clinical characteristics, molecular features and immune status
Source: PeerJ. 2021 Mar 31;9:e11133. doi: 10.7717/peerj.11133 (PMC8023235; doi:10.7717/peerj.11133)
Supplement: Supplemental Information 1 [file peerj-09-11133-s001.xlsx]

## Sheet: NCAM1
G1	DU145-1	NCAM1	UNKNOWN	SYBR	None	1	0.937695	1.06644	27.5295	27.4744	0.0499153	17.9471	0.00135522	0.00135522	1			DU145	PC-3
G2	DU145-1	NCAM1	UNKNOWN	SYBR	None	1	0.937695	1.06644	27.4322	27.4744	0.0499153	17.9471	0.00135522	0.00135522	1			1	1.63566
G3	DU145-1	NCAM1	UNKNOWN	SYBR	None	1	0.937695	1.06644	27.4614	27.4744	0.0499153	17.9471	0.00135522	0.00135522	1			1	1.94787
G4	PC-3-1	NCAM1	UNKNOWN	SYBR	None	1.63566	1.54811	1.72817	26.932	26.888	0.0382264	18.0707	0.00221668	0.00135522	1.63566			1	0.78436
G5	PC-3-1	NCAM1	UNKNOWN	SYBR	None	1.63566	1.54811	1.72817	26.8624	26.888	0.0382264	18.0707	0.00221668	0.00135522	1.63566			1	1.14668
G6	PC-3-1	NCAM1	UNKNOWN	SYBR	None	1.63566	1.54811	1.72817	26.8697	26.888	0.0382264	18.0707	0.00221668	0.00135522	1.63566			1	1.77765
G7	DU145-2	NCAM1	UNKNOWN	SYBR	None	0.982748	0.873333	1.10587	27.6489	27.5761	0.103373	18.0238	0.00133184	0.00133184	1
G8	DU145-2	NCAM1	UNKNOWN	SYBR	None	0.982748	0.873333	1.10587	27.4578	27.5761	0.103373	18.0238	0.00133184	0.00133184	1
G9	DU145-2	NCAM1	UNKNOWN	SYBR	None	0.982748	0.873333	1.10587	27.6217	27.5761	0.103373	18.0238	0.00133184	0.00133184	1
G10	PC-3-2	NCAM1	UNKNOWN	SYBR	None	1.91427	1.70244	2.15245	26.9718	26.999	0.044056	18.4085	0.00259425	0.00133184	1.94787
G11	PC-3-2	NCAM1	UNKNOWN	SYBR	None	1.91427	1.70244	2.15245	27.0498	26.999	0.044056	18.4085	0.00259425	0.00133184	1.94787
G12	PC-3-2	NCAM1	UNKNOWN	SYBR	None	1.91427	1.70244	2.15245	26.9754	26.999	0.044056	18.4085	0.00259425	0.00133184	1.94787
A1	DU145-1	Gapdh	UNKNOWN	SYBR	None				17.9535	17.9471	0.0293363
A2	DU145-1	Gapdh	UNKNOWN	SYBR	None				17.9151	17.9471	0.0293363
A3	DU145-1	Gapdh	UNKNOWN	SYBR	None				17.9727	17.9471	0.0293363
A4	PC-3-1	Gapdh	UNKNOWN	SYBR	None				18.0377	18.0707	0.0314665
A5	PC-3-1	Gapdh	UNKNOWN	SYBR	None				18.0739	18.0707	0.0314665
A6	PC-3-1	Gapdh	UNKNOWN	SYBR	None				18.1004	18.0707	0.0314665
A7	DU145-2	Gapdh	UNKNOWN	SYBR	None				18.0519	18.0238	0.024485
A8	DU145-2	Gapdh	UNKNOWN	SYBR	None				18.0073	18.0238	0.024485
A9	DU145-2	Gapdh	UNKNOWN	SYBR	None				18.0122	18.0238	0.024485
A10	PC-3-2	Gapdh	UNKNOWN	SYBR	None				18.3228	18.4085	0.0959104
A11	PC-3-2	Gapdh	UNKNOWN	SYBR	None				18.3907	18.4085	0.0959104
A12	PC-3-2	Gapdh	UNKNOWN	SYBR	None				18.5121	18.4085	0.0959104
F1	DU145-7	NCAM1	UNKNOWN	SYBR	None	1	0.917923	1.08942	27.5891	27.5595	0.0599827	19.7346	0.00441046	0.00441046	1
F2	DU145-7	NCAM1	UNKNOWN	SYBR	None	1	0.917923	1.08942	27.5989	27.5595	0.0599827	19.7346	0.00441046	0.00441046	1
F3	DU145-7	NCAM1	UNKNOWN	SYBR	None	1	0.917923	1.08942	27.4905	27.5595	0.0599827	19.7346	0.00441046	0.00441046	1
F4	PC-3-7	NCAM1	UNKNOWN	SYBR	None	0.784359	0.74547	0.825277	26.938	26.953	0.036869	18.7777	0.00345939	0.00441046	0.78436
F5	PC-3-7	NCAM1	UNKNOWN	SYBR	None	0.784359	0.74547	0.825277	26.926	26.953	0.036869	18.7777	0.00345939	0.00441046	0.78436
F6	PC-3-7	NCAM1	UNKNOWN	SYBR	None	0.784359	0.74547	0.825277	26.995	26.953	0.036869	18.7777	0.00345939	0.00441046	0.78436
F7	DU145-8	NCAM1	UNKNOWN	SYBR	None	0.913405	0.843007	0.989682	27.3987	27.4031	0.0678631	19.4475	0.00402854	0.00402854	1
F8	DU145-8	NCAM1	UNKNOWN	SYBR	None	0.913405	0.843007	0.989682	27.3375	27.4031	0.0678631	19.4475	0.00402854	0.00402854	1
F9	DU145-8	NCAM1	UNKNOWN	SYBR	None	0.913405	0.843007	0.989682	27.473	27.4031	0.0678631	19.4475	0.00402854	0.00402854	1
F10	PC-3-8	NCAM1	UNKNOWN	SYBR	None	1.04738	0.906407	1.21029	27.7687	27.6285	0.122139	19.8704	0.00461946	0.00402854	1.14668
F11	PC-3-8	NCAM1	UNKNOWN	SYBR	None	1.04738	0.906407	1.21029	27.5457	27.6285	0.122139	19.8704	0.00461946	0.00402854	1.14668
F12	PC-3-8	NCAM1	UNKNOWN	SYBR	None	1.04738	0.906407	1.21029	27.571	27.6285	0.122139	19.8704	0.00461946	0.00402854	1.14668
A1	DU145-7	Gapdh	UNKNOWN	SYBR	None				19.7109	19.7346	0.0484063
A2	DU145-7	Gapdh	UNKNOWN	SYBR	None				19.7027	19.7346	0.0484063
A3	DU145-7	Gapdh	UNKNOWN	SYBR	None				19.7903	19.7346	0.0484063
A4	PC-3-7	Gapdh	UNKNOWN	SYBR	None				18.748	18.7777	0.0271172
A5	PC-3-7	Gapdh	UNKNOWN	SYBR	None				18.8012	18.7777	0.0271172
A6	PC-3-7	Gapdh	UNKNOWN	SYBR	None				18.7839	18.7777	0.0271172
A7	DU145-8	Gapdh	UNKNOWN	SYBR	None				19.4696	19.4475	0.0246012
A8	DU145-8	Gapdh	UNKNOWN	SYBR	None				19.421	19.4475	0.0246012
A9	DU145-8	Gapdh	UNKNOWN	SYBR	None				19.452	19.4475	0.0246012
A10	PC-3-8	Gapdh	UNKNOWN	SYBR	None				19.8487	19.8704	0.0448351
A11	PC-3-8	Gapdh	UNKNOWN	SYBR	None				19.8406	19.8704	0.0448351
A12	PC-3-8	Gapdh	UNKNOWN	SYBR	None				19.922	19.8704	0.0448351
E1	DU145-9	NCAM1	UNKNOWN	SYBR	None				27.9098	27.9348	0.0274058	18.8124	0.00179432	0.00179432	1
E2	DU145-9	NCAM1	UNKNOWN	SYBR	None				27.9641	27.9348	0.0274058	18.8124	0.00179432	0.00179432	1
E3	DU145-9	NCAM1	UNKNOWN	SYBR	None				27.9304	27.9348	0.0274058	18.8124	0.00179432	0.00179432	1
E4	PC-3-9	NCAM1	UNKNOWN	SYBR	None				27.1652	27.1966	0.0279898	18.9042	0.00318966	0.00179432	1.77765
E5	PC-3-9	NCAM1	UNKNOWN	SYBR	None				27.219	27.1966	0.0279898	18.9042	0.00318966	0.00179432	1.77765
E6	PC-3-9	NCAM1	UNKNOWN	SYBR	None				27.2055	27.1966	0.0279898	18.9042	0.00318966	0.00179432	1.77765
D7	DU145-9	Gapdh	UNKNOWN	SYBR	None				18.8384	18.8124	0.0305724
D8	DU145-9	Gapdh	UNKNOWN	SYBR	None				18.8201	18.8124	0.0305724
D9	DU145-9	Gapdh	UNKNOWN	SYBR	None				18.7787	18.8124	0.0305724
D10	PC-3-9	Gapdh	UNKNOWN	SYBR	None				18.9149	18.9042	0.0204665
D11	PC-3-9	Gapdh	UNKNOWN	SYBR	None				18.9171	18.9042	0.0204665
D12	PC-3-9	Gapdh	UNKNOWN	SYBR	None				18.8806	18.9042	0.0204665

## Sheet: CXCL10
B1	DU145-1	CXCL10	UNKNOWN	SYBR	None	1	0.868686	1.15116	30.9017	30.778	0.123254	17.9471	0.000137254	0.000137254	1			DU145	PC-3
B2	DU145-1	CXCL10	UNKNOWN	SYBR	None	1	0.868686	1.15116	30.777	30.778	0.123254	17.9471	0.000137254	0.000137254	1			1	0.471742
B3	DU145-1	CXCL10	UNKNOWN	SYBR	None	1	0.868686	1.15116	30.6552	30.778	0.123254	17.9471	0.000137254	0.000137254	1			1	0.697935
B4	PC-3-1	CXCL10	UNKNOWN	SYBR	None	0.471743	0.351927	0.632351	31.9551	31.9854	0.261827	18.0707	6.47485e-05	0.000137254	0.471742			1	0.652294
B5	PC-3-1	CXCL10	UNKNOWN	SYBR	None	0.471743	0.351927	0.632351	32.2611	31.9854	0.261827	18.0707	6.47485e-05	0.000137254	0.471742			1	0.503619
B6	PC-3-1	CXCL10	UNKNOWN	SYBR	None	0.471743	0.351927	0.632351	31.7401	31.9854	0.261827	18.0707	6.47485e-05	0.000137254	0.471742
B7	DU145-2	CXCL10	UNKNOWN	SYBR	None	0.703001	0.581919	0.849278	31.2032	31.363	0.168355	18.0238	9.64898e-05	9.64898e-05	1
B8	DU145-2	CXCL10	UNKNOWN	SYBR	None	0.703001	0.581919	0.849278	31.3472	31.363	0.168355	18.0238	9.64898e-05	9.64898e-05	1
B9	DU145-2	CXCL10	UNKNOWN	SYBR	None	0.703001	0.581919	0.849278	31.5388	31.363	0.168355	18.0238	9.64898e-05	9.64898e-05	1
B10	PC-3-2	CXCL10	UNKNOWN	SYBR	None	0.49065	0.364023	0.661327	32.3405	32.2666	0.250964	18.4085	6.73436e-05	9.64898e-05	0.697935
B11	PC-3-2	CXCL10	UNKNOWN	SYBR	None	0.49065	0.364023	0.661327	31.987	32.2666	0.250964	18.4085	6.73436e-05	9.64898e-05	0.697935
B12	PC-3-2	CXCL10	UNKNOWN	SYBR	None	0.49065	0.364023	0.661327	32.4724	32.2666	0.250964	18.4085	6.73436e-05	9.64898e-05	0.697935
A1	DU145-1	Gapdh	UNKNOWN	SYBR	None				17.9535	17.9471	0.0293363
A2	DU145-1	Gapdh	UNKNOWN	SYBR	None				17.9151	17.9471	0.0293363
A3	DU145-1	Gapdh	UNKNOWN	SYBR	None				17.9727	17.9471	0.0293363
A4	PC-3-1	Gapdh	UNKNOWN	SYBR	None				18.0377	18.0707	0.0314665
A5	PC-3-1	Gapdh	UNKNOWN	SYBR	None				18.0739	18.0707	0.0314665
A6	PC-3-1	Gapdh	UNKNOWN	SYBR	None				18.1004	18.0707	0.0314665
A7	DU145-2	Gapdh	UNKNOWN	SYBR	None				18.0519	18.0238	0.024485
A8	DU145-2	Gapdh	UNKNOWN	SYBR	None				18.0073	18.0238	0.024485
A9	DU145-2	Gapdh	UNKNOWN	SYBR	None				18.0122	18.0238	0.024485
A10	PC-3-2	Gapdh	UNKNOWN	SYBR	None				18.3228	18.4085	0.0959104
A11	PC-3-2	Gapdh	UNKNOWN	SYBR	None				18.3907	18.4085	0.0959104
A12	PC-3-2	Gapdh	UNKNOWN	SYBR	None				18.5121	18.4085	0.0959104
B1	DU145-7	CXCL10	UNKNOWN	SYBR	None	1	0.832832	1.20072	31.8856	31.7041	0.157355	19.7346	0.000249365	0.000249365	1
B2	DU145-7	CXCL10	UNKNOWN	SYBR	None	1	0.832832	1.20072	31.6208	31.7041	0.157355	19.7346	0.000249365	0.000249365	1
B3	DU145-7	CXCL10	UNKNOWN	SYBR	None	1	0.832832	1.20072	31.6059	31.7041	0.157355	19.7346	0.000249365	0.000249365	1
B4	PC-3-7	CXCL10	UNKNOWN	SYBR	None	0.652294	0.529497	0.803569	31.2443	31.3636	0.185744	18.7777	0.000162659	0.000249365	0.652294
B5	PC-3-7	CXCL10	UNKNOWN	SYBR	None	0.652294	0.529497	0.803569	31.5776	31.3636	0.185744	18.7777	0.000162659	0.000249365	0.652294
B6	PC-3-7	CXCL10	UNKNOWN	SYBR	None	0.652294	0.529497	0.803569	31.2688	31.3636	0.185744	18.7777	0.000162659	0.000249365	0.652294
B7	DU145-8	CXCL10	UNKNOWN	SYBR	None	2.15222	2.03304	2.27838	30.2709	30.3112	0.0449835	19.4475	0.000536689	0.000536689	1
B8	DU145-8	CXCL10	UNKNOWN	SYBR	None	2.15222	2.03304	2.27838	30.3597	30.3112	0.0449835	19.4475	0.000536689	0.000536689	1
B9	DU145-8	CXCL10	UNKNOWN	SYBR	None	2.15222	2.03304	2.27838	30.3029	30.3112	0.0449835	19.4475	0.000536689	0.000536689	1
B10	PC-3-8	CXCL10	UNKNOWN	SYBR	None	1.0839	0.804844	1.45971	31.4308	31.7236	0.264129	19.8704	0.000270287	0.000536689	0.503619
B11	PC-3-8	CXCL10	UNKNOWN	SYBR	None	1.0839	0.804844	1.45971	31.7961	31.7236	0.264129	19.8704	0.000270287	0.000536689	0.503619
B12	PC-3-8	CXCL10	UNKNOWN	SYBR	None	1.0839	0.804844	1.45971	31.944	31.7236	0.264129	19.8704	0.000270287	0.000536689	0.503619
A1	DU145-7	Gapdh	UNKNOWN	SYBR	None				19.7109	19.7346	0.0484063
A2	DU145-7	Gapdh	UNKNOWN	SYBR	None				19.7027	19.7346	0.0484063
A3	DU145-7	Gapdh	UNKNOWN	SYBR	None				19.7903	19.7346	0.0484063
A4	PC-3-7	Gapdh	UNKNOWN	SYBR	None				18.748	18.7777	0.0271172
A5	PC-3-7	Gapdh	UNKNOWN	SYBR	None				18.8012	18.7777	0.0271172
A6	PC-3-7	Gapdh	UNKNOWN	SYBR	None				18.7839	18.7777	0.0271172
A7	DU145-8	Gapdh	UNKNOWN	SYBR	None				19.4696	19.4475	0.0246012
A8	DU145-8	Gapdh	UNKNOWN	SYBR	None				19.421	19.4475	0.0246012
A9	DU145-8	Gapdh	UNKNOWN	SYBR	None				19.452	19.4475	0.0246012
A10	PC-3-8	Gapdh	UNKNOWN	SYBR	None				19.8487	19.8704	0.0448351
A11	PC-3-8	Gapdh	UNKNOWN	SYBR	None				19.8406	19.8704	0.0448351
A12	PC-3-8	Gapdh	UNKNOWN	SYBR	None				19.922	19.8704	0.0448351

## Sheet: TNFSF11
F1	DU145-1	TNFSF11	UNKNOWN	SYBR	None	1	0.772081	1.2952	28.91	28.9128	0.044468	17.9471	0.000500041	0.000500041	1			DU145	PC-3
F2	DU145-1	TNFSF11	UNKNOWN	SYBR	None	1	0.772081	1.2952	28.9586	28.9128	0.044468	17.9471	0.000500041	0.000500041	1			1	4.30062
F3	DU145-1	TNFSF11	UNKNOWN	SYBR	None	1	0.772081	1.2952	28.8698	28.9128	0.044468	17.9471	0.000500041	0.000500041	1			1	4.37049
F4	PC-3-1	TNFSF11	UNKNOWN	SYBR	None	2.68124	2.07352	3.46708	26.932	26.9318	0.0064833	18.0707	0.00215049	0.000500041	4.30062			1	2.84772
F5	PC-3-1	TNFSF11	UNKNOWN	SYBR	None	2.68124	2.07352	3.46708	26.9252	26.9318	0.0064833	18.0707	0.00215049	0.000500041	4.30062			1	1.06139
F6	PC-3-1	TNFSF11	UNKNOWN	SYBR	None	2.68124	2.07352	3.46708	26.9381	26.9318	0.0064833	18.0707	0.00215049	0.000500041	4.30062			1	8.20757
F7	DU145-2	TNFSF11	UNKNOWN	SYBR	None	1.42852	1.18828	1.71733	28.9211	28.9496	0.0263043	18.0238	0.00051404	0.00051404	1
F8	DU145-2	TNFSF11	UNKNOWN	SYBR	None	1.42852	1.18828	1.71733	28.9548	28.9496	0.0263043	18.0238	0.00051404	0.00051404	1
F9	DU145-2	TNFSF11	UNKNOWN	SYBR	None	1.42852	1.18828	1.71733	28.973	28.9496	0.0263043	18.0238	0.00051404	0.00051404	1
F10	PC-3-2	TNFSF11	UNKNOWN	SYBR	None	3.00527	2.30534	3.91772	27.2122	27.2066	0.0192245	18.4085	0.0022466	0.00051404	4.37049
F11	PC-3-2	TNFSF11	UNKNOWN	SYBR	None	3.00527	2.30534	3.91772	27.1852	27.2066	0.0192245	18.4085	0.0022466	0.00051404	4.37049
F12	PC-3-2	TNFSF11	UNKNOWN	SYBR	None	3.00527	2.30534	3.91772	27.2224	27.2066	0.0192245	18.4085	0.0022466	0.00051404	4.37049
A1	DU145-1	Gapdh	UNKNOWN	SYBR	None				17.9535	17.9471	0.0293363
A2	DU145-1	Gapdh	UNKNOWN	SYBR	None				17.9151	17.9471	0.0293363
A3	DU145-1	Gapdh	UNKNOWN	SYBR	None				17.9727	17.9471	0.0293363
A4	PC-3-1	Gapdh	UNKNOWN	SYBR	None				18.0377	18.0707	0.0314665
A5	PC-3-1	Gapdh	UNKNOWN	SYBR	None				18.0739	18.0707	0.0314665
A6	PC-3-1	Gapdh	UNKNOWN	SYBR	None				18.1004	18.0707	0.0314665
A7	DU145-2	Gapdh	UNKNOWN	SYBR	None				18.0519	18.0238	0.024485
A8	DU145-2	Gapdh	UNKNOWN	SYBR	None				18.0073	18.0238	0.024485
A9	DU145-2	Gapdh	UNKNOWN	SYBR	None				18.0122	18.0238	0.024485
A10	PC-3-2	Gapdh	UNKNOWN	SYBR	None				18.3228	18.4085	0.0959104
A11	PC-3-2	Gapdh	UNKNOWN	SYBR	None				18.3907	18.4085	0.0959104
A12	PC-3-2	Gapdh	UNKNOWN	SYBR	None				18.5121	18.4085	0.0959104
A1	DU145-7	TNFSF11	UNKNOWN	SYBR	None				29.9771	30.0563	0.0935809	19.7346	0.000781405	0.000781405	1
A2	DU145-7	TNFSF11	UNKNOWN	SYBR	None				30.1596	30.0563	0.0935809	19.7346	0.000781405	0.000781405	1
A3	DU145-7	TNFSF11	UNKNOWN	SYBR	None				30.0321	30.0563	0.0935809	19.7346	0.000781405	0.000781405	1
A4	PC-3-7	TNFSF11	UNKNOWN	SYBR	None				27.5691	27.5895	0.0304979	18.7777	0.00222523	0.000781405	2.84772
A5	PC-3-7	TNFSF11	UNKNOWN	SYBR	None				27.6246	27.5895	0.0304979	18.7777	0.00222523	0.000781405	2.84772
A6	PC-3-7	TNFSF11	UNKNOWN	SYBR	None				27.575	27.5895	0.0304979	18.7777	0.00222523	0.000781405	2.84772
A7	DU145-8	TNFSF11	UNKNOWN	SYBR	None				29.9363	29.838	0.0938182	19.4475	0.000744992	0.000744992	1
A8	DU145-8	TNFSF11	UNKNOWN	SYBR	None				29.7495	29.838	0.0938182	19.4475	0.000744992	0.000744992	1
A9	DU145-8	TNFSF11	UNKNOWN	SYBR	None				29.8282	29.838	0.0938182	19.4475	0.000744992	0.000744992	1
A10	PC-3-8	TNFSF11	UNKNOWN	SYBR	None				29.9775	30.1749	0.198998	19.8704	0.000790725	0.000744992	1.06139
A11	PC-3-8	TNFSF11	UNKNOWN	SYBR	None				30.1719	30.1749	0.198998	19.8704	0.000790725	0.000744992	1.06139
A12	PC-3-8	TNFSF11	UNKNOWN	SYBR	None				30.3754	30.1749	0.198998	19.8704	0.000790725	0.000744992	1.06139
A1	DU145-7	Gapdh	UNKNOWN	SYBR	None				19.7109	19.7346	0.0484063
A2	DU145-7	Gapdh	UNKNOWN	SYBR	None				19.7027	19.7346	0.0484063
A3	DU145-7	Gapdh	UNKNOWN	SYBR	None				19.7903	19.7346	0.0484063
A4	PC-3-7	Gapdh	UNKNOWN	SYBR	None				18.748	18.7777	0.0271172
A5	PC-3-7	Gapdh	UNKNOWN	SYBR	None				18.8012	18.7777	0.0271172
A6	PC-3-7	Gapdh	UNKNOWN	SYBR	None				18.7839	18.7777	0.0271172
A7	DU145-8	Gapdh	UNKNOWN	SYBR	None				19.4696	19.4475	0.0246012
A8	DU145-8	Gapdh	UNKNOWN	SYBR	None				19.421	19.4475	0.0246012
A9	DU145-8	Gapdh	UNKNOWN	SYBR	None				19.452	19.4475	0.0246012
A10	PC-3-8	Gapdh	UNKNOWN	SYBR	None				19.8487	19.8704	0.0448351
A11	PC-3-8	Gapdh	UNKNOWN	SYBR	None				19.8406	19.8704	0.0448351
A12	PC-3-8	Gapdh	UNKNOWN	SYBR	None				19.922	19.8704	0.0448351
H1	DU145-9	TNFSF11	UNKNOWN	SYBR	None				29.809	29.741	0.0697797	18.8124	0.000513049	0.000513049	1
H2	DU145-9	TNFSF11	UNKNOWN	SYBR	None				29.6696	29.741	0.0697797	18.8124	0.000513049	0.000513049	1
H3	DU145-9	TNFSF11	UNKNOWN	SYBR	None				29.7446	29.741	0.0697797	18.8124	0.000513049	0.000513049	1
H4	PC-3-9	TNFSF11	UNKNOWN	SYBR	None				26.8207	26.7959	0.134993	18.9042	0.00421089	0.000513049	8.20757
H5	PC-3-9	TNFSF11	UNKNOWN	SYBR	None				26.9167	26.7959	0.134993	18.9042	0.00421089	0.000513049	8.20757
H6	PC-3-9	TNFSF11	UNKNOWN	SYBR	None				26.6502	26.7959	0.134993	18.9042	0.00421089	0.000513049	8.20757
D7	DU145-9	Gapdh	UNKNOWN	SYBR	None				18.8384	18.8124	0.0305724
D8	DU145-9	Gapdh	UNKNOWN	SYBR	None				18.8201	18.8124	0.0305724
D9	DU145-9	Gapdh	UNKNOWN	SYBR	None				18.7787	18.8124	0.0305724
D10	PC-3-9	Gapdh	UNKNOWN	SYBR	None				18.9149	18.9042	0.0204665
D11	PC-3-9	Gapdh	UNKNOWN	SYBR	None				18.9171	18.9042	0.0204665
D12	PC-3-9	Gapdh	UNKNOWN	SYBR	None				18.8806	18.9042	0.0204665

## Sheet: C3
H1	DU145-1	C3	UNKNOWN	SYBR	None	1	0.762645	1.31123	30.5121	30.5307	0.0851654	17.9471	0.000162914	0.000162914	1			DU145	PC-3
H2	DU145-1	C3	UNKNOWN	SYBR	None	1	0.762645	1.31123	30.4564	30.5307	0.0851654	17.9471	0.000162914	0.000162914	1			1	0.557205
H3	DU145-1	C3	UNKNOWN	SYBR	None	1	0.762645	1.31123	30.6236	30.5307	0.0851654	17.9471	0.000162914	0.000162914	1			1	0.704988
H4	PC-3-1	C3	UNKNOWN	SYBR	None	0.347393	0.268613	0.449277	31.5097	31.498	0.0102495	18.0707	9.07763e-05	0.000162914	0.557205			1	0.271978
H5	PC-3-1	C3	UNKNOWN	SYBR	None	0.347393	0.268613	0.449277	31.4909	31.498	0.0102495	18.0707	9.07763e-05	0.000162914	0.557205			1	0.792764
H6	PC-3-1	C3	UNKNOWN	SYBR	None	0.347393	0.268613	0.449277	31.4933	31.498	0.0102495	18.0707	9.07763e-05	0.000162914	0.557205
H7	DU145-2	C3	UNKNOWN	SYBR	None	1.10088	0.915818	1.32334	30.9732	30.9434	0.0258289	18.0238	0.000129063	0.000129063	1
H8	DU145-2	C3	UNKNOWN	SYBR	None	1.10088	0.915818	1.32334	30.9301	30.9434	0.0258289	18.0238	0.000129063	0.000129063	1
H9	DU145-2	C3	UNKNOWN	SYBR	None	1.10088	0.915818	1.32334	30.9269	30.9434	0.0258289	18.0238	0.000129063	0.000129063	1
H10	PC-3-2	C3	UNKNOWN	SYBR	None	0.373584	0.27184	0.513408	31.9859	31.8325	0.159062	18.4085	9.09877e-05	0.000129063	0.704988
H11	PC-3-2	C3	UNKNOWN	SYBR	None	0.373584	0.27184	0.513408	31.6683	31.8325	0.159062	18.4085	9.09877e-05	0.000129063	0.704988
H12	PC-3-2	C3	UNKNOWN	SYBR	None	0.373584	0.27184	0.513408	31.8433	31.8325	0.159062	18.4085	9.09877e-05	0.000129063	0.704988
A1	DU145-1	Gapdh	UNKNOWN	SYBR	None				17.9535	17.9471	0.0293363
A2	DU145-1	Gapdh	UNKNOWN	SYBR	None				17.9151	17.9471	0.0293363
A3	DU145-1	Gapdh	UNKNOWN	SYBR	None				17.9727	17.9471	0.0293363
A4	PC-3-1	Gapdh	UNKNOWN	SYBR	None				18.0377	18.0707	0.0314665
A5	PC-3-1	Gapdh	UNKNOWN	SYBR	None				18.0739	18.0707	0.0314665
A6	PC-3-1	Gapdh	UNKNOWN	SYBR	None				18.1004	18.0707	0.0314665
A7	DU145-2	Gapdh	UNKNOWN	SYBR	None				18.0519	18.0238	0.024485
A8	DU145-2	Gapdh	UNKNOWN	SYBR	None				18.0073	18.0238	0.024485
A9	DU145-2	Gapdh	UNKNOWN	SYBR	None				18.0122	18.0238	0.024485
A10	PC-3-2	Gapdh	UNKNOWN	SYBR	None				18.3228	18.4085	0.0959104
A11	PC-3-2	Gapdh	UNKNOWN	SYBR	None				18.3907	18.4085	0.0959104
A12	PC-3-2	Gapdh	UNKNOWN	SYBR	None				18.5121	18.4085	0.0959104
C1	DU145-7	C3	UNKNOWN	SYBR	None	1	0.897003	1.11482	29.8547	29.8267	0.0285091	19.7346	0.000916179	0.000916179	1
C2	DU145-7	C3	UNKNOWN	SYBR	None	1	0.897003	1.11482	29.7977	29.8267	0.0285091	19.7346	0.000916179	0.000916179	1
C3	DU145-7	C3	UNKNOWN	SYBR	None	1	0.897003	1.11482	29.8278	29.8267	0.0285091	19.7346	0.000916179	0.000916179	1
C4	PC-3-7	C3	UNKNOWN	SYBR	None	0.0955073	0.0800623	0.113932	30.9141	30.7482	0.155802	18.7777	0.00024918	0.000916179	0.271978
C5	PC-3-7	C3	UNKNOWN	SYBR	None	0.0955073	0.0800623	0.113932	30.7256	30.7482	0.155802	18.7777	0.00024918	0.000916179	0.271978
C6	PC-3-7	C3	UNKNOWN	SYBR	None	0.0955073	0.0800623	0.113932	30.605	30.7482	0.155802	18.7777	0.00024918	0.000916179	0.271978
C7	DU145-8	C3	UNKNOWN	SYBR	None	0.724297	0.643725	0.814954	30.1213	30.0738	0.049633	19.4475	0.000632663	0.000632663	1
C8	DU145-8	C3	UNKNOWN	SYBR	None	0.724297	0.643725	0.814954	30.0223	30.0738	0.049633	19.4475	0.000632663	0.000632663	1
C9	DU145-8	C3	UNKNOWN	SYBR	None	0.724297	0.643725	0.814954	30.0778	30.0738	0.049633	19.4475	0.000632663	0.000632663	1
C10	PC-3-8	C3	UNKNOWN	SYBR	None	0.540987	0.433566	0.675023	30.8346	30.8317	0.00935475	19.8704	0.000501552	0.000632663	0.792764
C11	PC-3-8	C3	UNKNOWN	SYBR	None	0.540987	0.433566	0.675023	30.8213	30.8317	0.00935475	19.8704	0.000501552	0.000632663	0.792764
C12	PC-3-8	C3	UNKNOWN	SYBR	None	0.540987	0.433566	0.675023	30.8393	30.8317	0.00935475	19.8704	0.000501552	0.000632663	0.792764
A1	DU145-7	Gapdh	UNKNOWN	SYBR	None				19.7109	19.7346	0.0484063
A2	DU145-7	Gapdh	UNKNOWN	SYBR	None				19.7027	19.7346	0.0484063
A3	DU145-7	Gapdh	UNKNOWN	SYBR	None				19.7903	19.7346	0.0484063
A4	PC-3-7	Gapdh	UNKNOWN	SYBR	None				18.748	18.7777	0.0271172
A5	PC-3-7	Gapdh	UNKNOWN	SYBR	None				18.8012	18.7777	0.0271172
A6	PC-3-7	Gapdh	UNKNOWN	SYBR	None				18.7839	18.7777	0.0271172
A7	DU145-8	Gapdh	UNKNOWN	SYBR	None				19.4696	19.4475	0.0246012
A8	DU145-8	Gapdh	UNKNOWN	SYBR	None				19.421	19.4475	0.0246012
A9	DU145-8	Gapdh	UNKNOWN	SYBR	None				19.452	19.4475	0.0246012
A10	PC-3-8	Gapdh	UNKNOWN	SYBR	None				19.8487	19.8704	0.0448351
A11	PC-3-8	Gapdh	UNKNOWN	SYBR	None				19.8406	19.8704	0.0448351
A12	PC-3-8	Gapdh	UNKNOWN	SYBR	None				19.922	19.8704	0.0448351

## Sheet: AGT
G1	DU145-1	AGT	UNKNOWN	SYBR	None	1	0.686888	1.45584	33.7156	33.6903	0.249087	17.9471	1.82318e-05	1.82318e-05	1			DU145	PC-3
G2	DU145-1	AGT	UNKNOWN	SYBR	None	1	0.686888	1.45584	33.4295	33.6903	0.249087	17.9471	1.82318e-05	1.82318e-05	1			1	0.56503
G3	DU145-1	AGT	UNKNOWN	SYBR	None	1	0.686888	1.45584	33.9258	33.6903	0.249087	17.9471	1.82318e-05	1.82318e-05	1			1	0.952729
G4	PC-3-1	AGT	UNKNOWN	SYBR	None	0.352271	0.263677	0.470633	34.7552	34.6374	0.120409	18.0707	1.03015e-05	1.82318e-05	0.56503			1	0.450604
G5	PC-3-1	AGT	UNKNOWN	SYBR	None	0.352271	0.263677	0.470633	34.6426	34.6374	0.120409	18.0707	1.03015e-05	1.82318e-05	0.56503			1	0.774038
G6	PC-3-1	AGT	UNKNOWN	SYBR	None	0.352271	0.263677	0.470633	34.5146	34.6374	0.120409	18.0707	1.03015e-05	1.82318e-05	0.56503			1	0.304294
G7	DU145-2	AGT	UNKNOWN	SYBR	None	0.805839	0.555767	1.16843	34.5356	34.5531	0.29162	18.0238	1.05726e-05	1.05726e-05	1
G8	DU145-2	AGT	UNKNOWN	SYBR	None	0.805839	0.555767	1.16843	34.8531	34.5531	0.29162	18.0238	1.05726e-05	1.05726e-05	1
G9	DU145-2	AGT	UNKNOWN	SYBR	None	0.805839	0.555767	1.16843	34.2706	34.5531	0.29162	18.0238	1.05726e-05	1.05726e-05	1
G10	PC-3-2	AGT	UNKNOWN	SYBR	None	0.36956	0.254687	0.536244	34.9449	35.0077	0.235977	18.4085	1.00728e-05	1.05726e-05	0.952729
G11	PC-3-2	AGT	UNKNOWN	SYBR	None	0.36956	0.254687	0.536244	34.8095	35.0077	0.235977	18.4085	1.00728e-05	1.05726e-05	0.952729
G12	PC-3-2	AGT	UNKNOWN	SYBR	None	0.36956	0.254687	0.536244	35.2688	35.0077	0.235977	18.4085	1.00728e-05	1.05726e-05	0.952729
A1	DU145-1	Gapdh	UNKNOWN	SYBR	None				17.9535	17.9471	0.0293363
A2	DU145-1	Gapdh	UNKNOWN	SYBR	None				17.9151	17.9471	0.0293363
A3	DU145-1	Gapdh	UNKNOWN	SYBR	None				17.9727	17.9471	0.0293363
A4	PC-3-1	Gapdh	UNKNOWN	SYBR	None				18.0377	18.0707	0.0314665
A5	PC-3-1	Gapdh	UNKNOWN	SYBR	None				18.0739	18.0707	0.0314665
A6	PC-3-1	Gapdh	UNKNOWN	SYBR	None				18.1004	18.0707	0.0314665
A7	DU145-2	Gapdh	UNKNOWN	SYBR	None				18.0519	18.0238	0.024485
A8	DU145-2	Gapdh	UNKNOWN	SYBR	None				18.0073	18.0238	0.024485
A9	DU145-2	Gapdh	UNKNOWN	SYBR	None				18.0122	18.0238	0.024485
A10	PC-3-2	Gapdh	UNKNOWN	SYBR	None				18.3228	18.4085	0.0959104
A11	PC-3-2	Gapdh	UNKNOWN	SYBR	None				18.3907	18.4085	0.0959104
A12	PC-3-2	Gapdh	UNKNOWN	SYBR	None				18.5121	18.4085	0.0959104
B1	DU145-7	AGT	UNKNOWN	SYBR	None	1	0.651834	1.53413	33.503	33.2645	0.37363	19.7346	8.45477e-05	8.45477e-05	1
B2	DU145-7	AGT	UNKNOWN	SYBR	None	1	0.651834	1.53413	32.8339	33.2645	0.37363	19.7346	8.45477e-05	8.45477e-05	1
B3	DU145-7	AGT	UNKNOWN	SYBR	None	1	0.651834	1.53413	33.4567	33.2645	0.37363	19.7346	8.45477e-05	8.45477e-05	1
B4	PC-3-7	AGT	UNKNOWN	SYBR	None	0.158233	0.146397	0.171026	33.389	33.4577	0.0629777	18.7777	3.80976e-05	8.45477e-05	0.450604
B5	PC-3-7	AGT	UNKNOWN	SYBR	None	0.158233	0.146397	0.171026	33.5128	33.4577	0.0629777	18.7777	3.80976e-05	8.45477e-05	0.450604
B6	PC-3-7	AGT	UNKNOWN	SYBR	None	0.158233	0.146397	0.171026	33.4712	33.4577	0.0629777	18.7777	3.80976e-05	8.45477e-05	0.450604
B7	DU145-8	AGT	UNKNOWN	SYBR	None	1.16158	1.03447	1.3043	32.8265	32.8302	0.0455733	19.4475	9.36324e-05	9.36324e-05	1
B8	DU145-8	AGT	UNKNOWN	SYBR	None	1.16158	1.03447	1.3043	32.8775	32.8302	0.0455733	19.4475	9.36324e-05	9.36324e-05	1
B9	DU145-8	AGT	UNKNOWN	SYBR	None	1.16158	1.03447	1.3043	32.7865	32.8302	0.0455733	19.4475	9.36324e-05	9.36324e-05	1
B10	PC-3-8	AGT	UNKNOWN	SYBR	None	0.847103	0.487922	1.47069	33.3395	33.6226	0.45488	19.8704	7.2475e-05	9.36324e-05	0.774038
B11	PC-3-8	AGT	UNKNOWN	SYBR	None	0.847103	0.487922	1.47069	33.381	33.6226	0.45488	19.8704	7.2475e-05	9.36324e-05	0.774038
B12	PC-3-8	AGT	UNKNOWN	SYBR	None	0.847103	0.487922	1.47069	34.1473	33.6226	0.45488	19.8704	7.2475e-05	9.36324e-05	0.774038
A1	DU145-7	Gapdh	UNKNOWN	SYBR	None				19.7109	19.7346	0.0484063
A2	DU145-7	Gapdh	UNKNOWN	SYBR	None				19.7027	19.7346	0.0484063
A3	DU145-7	Gapdh	UNKNOWN	SYBR	None				19.7903	19.7346	0.0484063
A4	PC-3-7	Gapdh	UNKNOWN	SYBR	None				18.748	18.7777	0.0271172
A5	PC-3-7	Gapdh	UNKNOWN	SYBR	None				18.8012	18.7777	0.0271172
A6	PC-3-7	Gapdh	UNKNOWN	SYBR	None				18.7839	18.7777	0.0271172
A7	DU145-8	Gapdh	UNKNOWN	SYBR	None				19.4696	19.4475	0.0246012
A8	DU145-8	Gapdh	UNKNOWN	SYBR	None				19.421	19.4475	0.0246012
A9	DU145-8	Gapdh	UNKNOWN	SYBR	None				19.452	19.4475	0.0246012
A10	PC-3-8	Gapdh	UNKNOWN	SYBR	None				19.8487	19.8704	0.0448351
A11	PC-3-8	Gapdh	UNKNOWN	SYBR	None				19.8406	19.8704	0.0448351
A12	PC-3-8	Gapdh	UNKNOWN	SYBR	None				19.922	19.8704	0.0448351
H7	DU145-9	AGT	UNKNOWN	SYBR	None	0.361729	0.256519	0.510089	34.6375	34.4163	0.301351	18.8124	2.00802e-05	2.00802e-05	1
H8	DU145-9	AGT	UNKNOWN	SYBR	None	0.361729	0.256519	0.510089	34.5384	34.4163	0.301351	18.8124	2.00802e-05	2.00802e-05	1
H9	DU145-9	AGT	UNKNOWN	SYBR	None	0.361729	0.256519	0.510089	34.0731	34.4163	0.301351	18.8124	2.00802e-05	2.00802e-05	1
H10	PC-3-9	AGT	UNKNOWN	SYBR	None	0.013411	0.00721021	0.0249445	35.8912	36.2245	0.541965	18.9042	6.11027e-06	2.00802e-05	0.304294
H11	PC-3-9	AGT	UNKNOWN	SYBR	None	0.013411	0.00721021	0.0249445	35.9325	36.2245	0.541965	18.9042	6.11027e-06	2.00802e-05	0.304294
H12	PC-3-9	AGT	UNKNOWN	SYBR	None	0.013411	0.00721021	0.0249445	36.8499	36.2245	0.541965	18.9042	6.11027e-06	2.00802e-05	0.304294
D7	DU145-9	Gapdh	UNKNOWN	SYBR	None				18.8384	18.8124	0.0305724
D8	DU145-9	Gapdh	UNKNOWN	SYBR	None				18.8201	18.8124	0.0305724
D9	DU145-9	Gapdh	UNKNOWN	SYBR	None				18.7787	18.8124	0.0305724
D10	PC-3-9	Gapdh	UNKNOWN	SYBR	None				18.9149	18.9042	0.0204665
D11	PC-3-9	Gapdh	UNKNOWN	SYBR	None				18.9171	18.9042	0.0204665
D12	PC-3-9	Gapdh	UNKNOWN	SYBR	None				18.8806	18.9042	0.0204665
